# Supplementary material for: Four Weeks of Detraining Induced by COVID-19 Reverse Cardiac Improvements from Eight Weeks of Fitness-Dance Training in Older Adults with Mild Cognitive Impairment
Source: MDPI journal article supplement (doi:10.3390/ijerph18115930), 2021-05-31
Supplement: s1 [file s1]

Supplementary Materials:

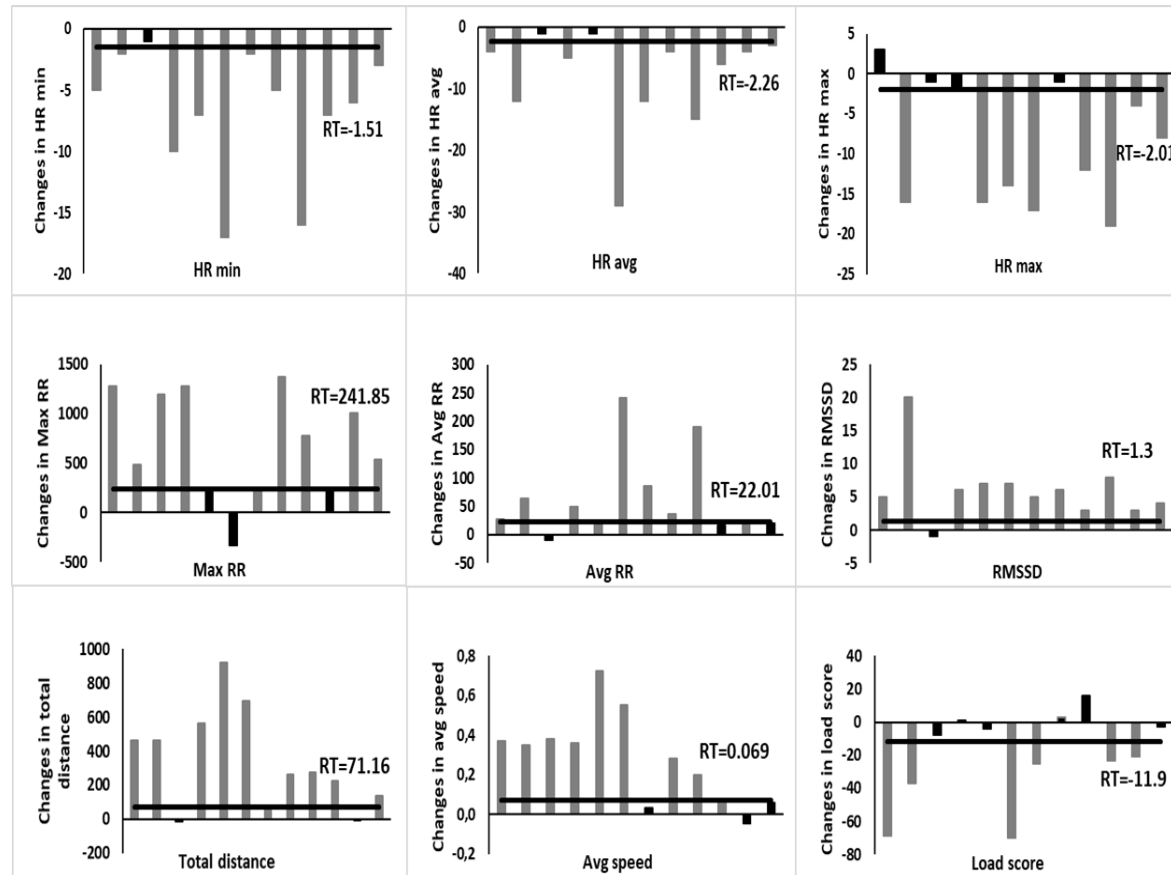

Figure S1. Individual responsiveness scores to 8 weeks Dance-training training program.

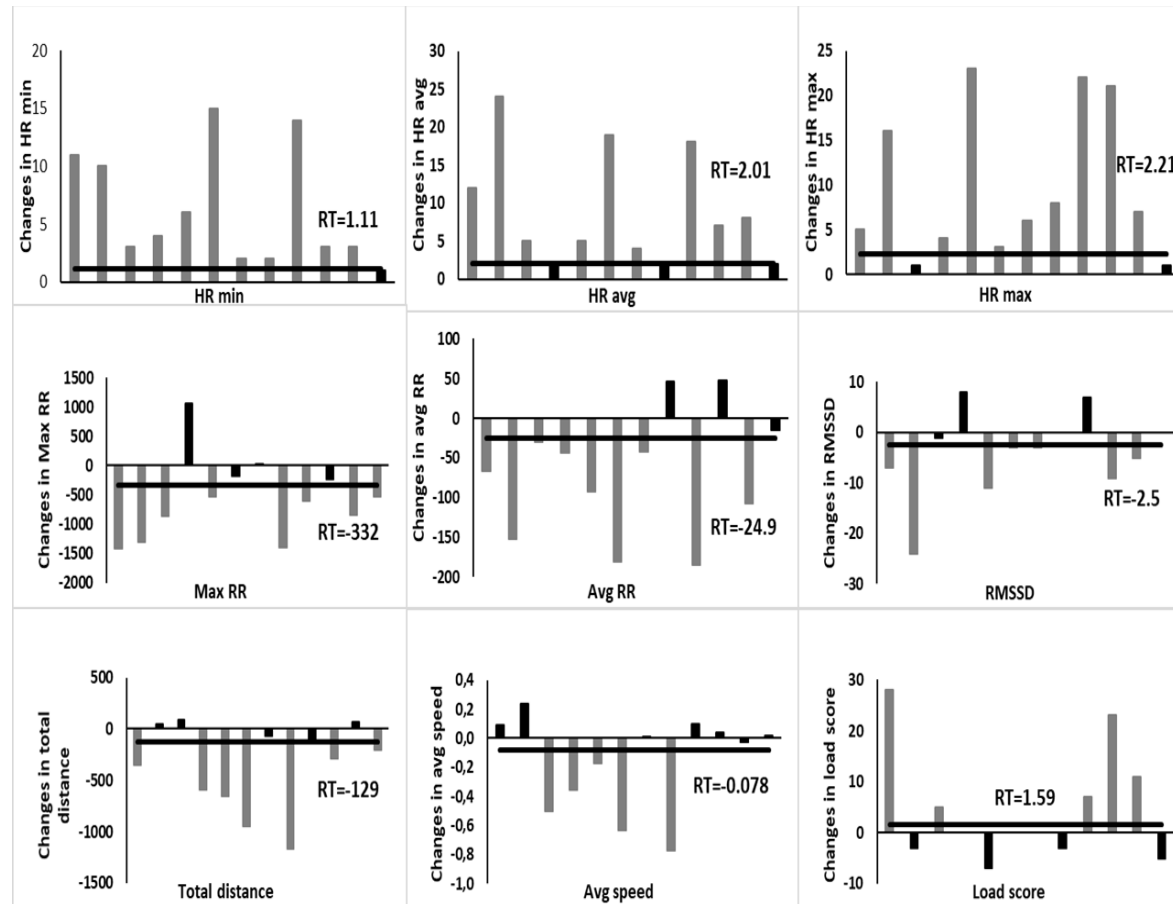

**Figure S2.** Individual responsiveness scores to 4 weeks Covid-19 induced detraining
